# Supplementary material for: A Novel Combination of Withaferin A and Sulforaphane Inhibits Epigenetic Machinery, Cellular Viability and Induces Apoptosis of Breast Cancer Cells
Source: Int J Mol Sci. 2017 May 19;18(5):1092. doi: 10.3390/ijms18051092 (PMC5455001; doi:10.3390/ijms18051092)
Supplement: Supplementary file 1 [file ijms-18-01092-s001.pdf]

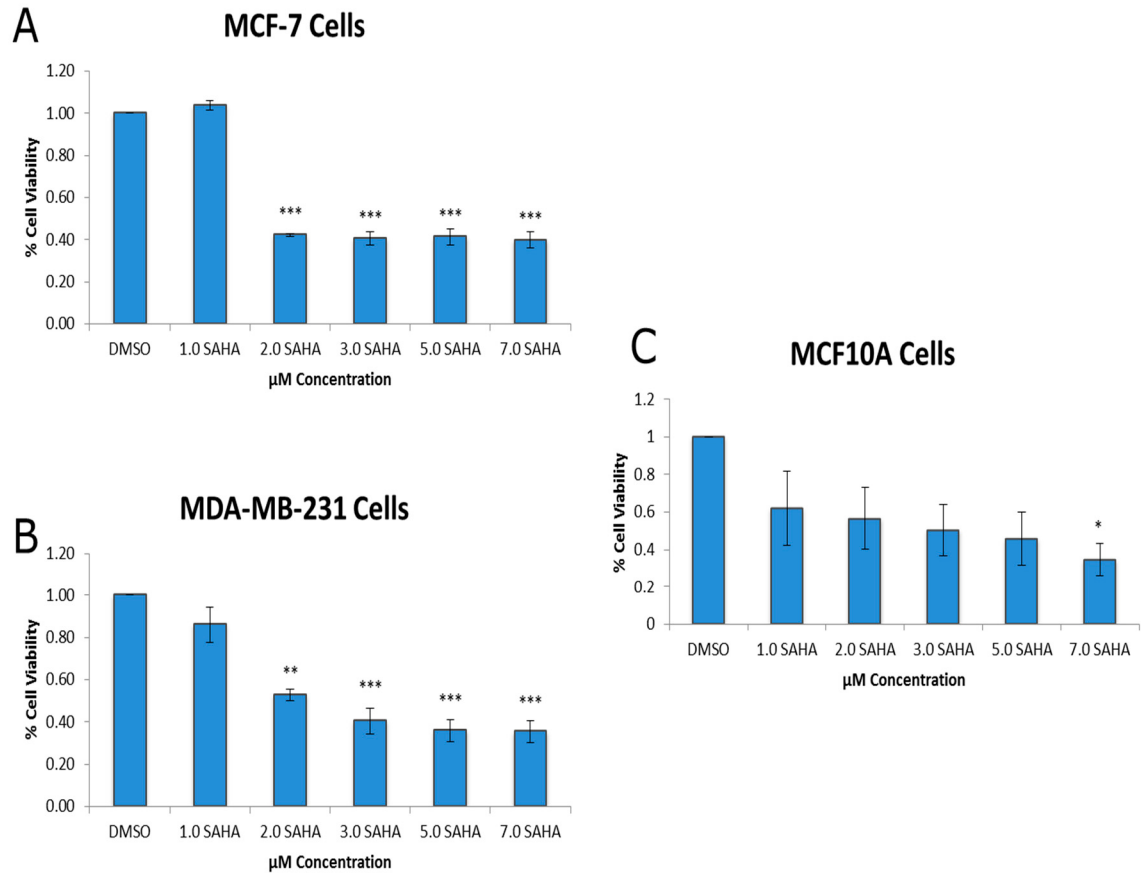

**Figure S1.** FDA-approved HDAC inhibitor SAHA decreases cellular viability in MCF-7 and MDA-MB-231 breast cancer cells. **(A)** MTT assay of MCF-7 cells indicates decreases in cell viability at increasing concentrations of SAHA. **(B)** MDA-MB-231 cells show decreases in viability at increasing concentrations of SAHA. **(C)** The non-cancerous MCF10A cells show statistically insignificant decreases in cell viability except for the relatively high concentration of 7  $\mu$ M SAHA. ( $n = 3$ ; SEM, \*  $p < 0.05$ , \*\*  $p < 0.01$ , \*\*\*  $p < 0.001$ ).

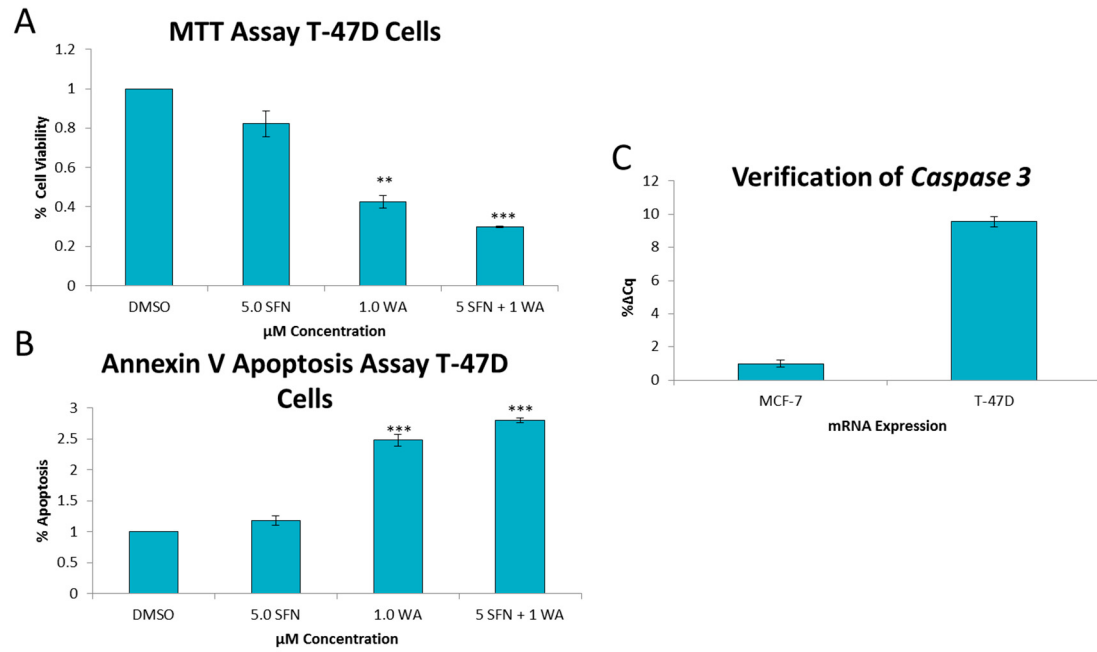

**Figure S2.** SFN and WA promote cell death in T-47D breast cancer cells. **(A)** MTT assay of T-47D cells indicates decreases in cell viability with the incorporation of the indicated compounds after 3 days. **(B)** FACS analysis demonstrates an increase in apoptosis caused by combinatorial WA and SFN after 3 days. **(C)** Cells were treated for 3 days with DMSO. qRT-PCR verifies that the caspase 3 gene is expressed in T-47D breast cancer cells ( $n = 3$ ; SEM, \*\*  $p < 0.01$ , \*\*\*  $p < 0.001$ ).
